# Supplementary material for: Mobilization of pre-existing polyclonal T cells specific to neoantigens but not self-antigens during treatment of a patient with melanoma with bempegaldesleukin and nivolumab
Source: HighWire-hosted journal article supplement (doi:10.1136/jitc-2020-001591), 2020-12-01
Supplement: jitc-2020-001591supp004_data_supplement.xlsx [file jitc-2020-001591supp004_data_supplement.xlsx]

## Sheet: Mel-RNA-merged-de (1)
gene_id	Mel02.tumor.RNA.on.tx	Mel02.tumor.RNA	PostFC
GREM1	18.58	0.01	923.531
VGF	43.62	0.06	622.939
SFRP2	26.17	0.05	384.144
CLC	1371.65	4.84	303.513
NKX2-5	6.03	0	255.515
ALOX15	22.58	0.09	224.178
SPINK1	75.76	0.34	189.15
SERPINA3	1378.47	8.03	188.367
PCP4	18.83	0	185.349
TM4SF19	7.07	0	167.074
LGALS12	8.49	0.03	165.01
CXCL13	178.16	1.17	161.719
SALL1	1.16	0	158.212
PRSS3	9.22	0	153.196
HAMP	168.15	1.01	153.083
MMP12	10.9	0.06	149.976
FAM101A	2.77	0	148.854
PRSS3P2	8.13	0	148.751
PRSS1	8.54	0	145.551
CHIT1	663.78	5.2	140.613
CCL26	13.92	0	139.496
PLA2G2D	205.22	1.62	137.016
CCL3L1	8.06	0	136.155
CEBPE	24.35	0.17	131.198
CCR3	17.18	0.12	125.74
SERPINA5	19.49	0.15	124.111
PRSS33	13.66	0.09	124.083
KRT15	2.71	0	122.652
UCN2	15.43	0.11	120.58
DLX2	2.06	0	119.845
ADAMDEC1	57.78	0.53	116.799
C15orf48	69.6	0.66	110.138
FFAR3	11.66	0.1	104.422
CST1	53.14	0.5	101.656
CST2	7.17	0	98.3215
VSTM1	22.82	0.26	90.6349
PCSK1	1.42	0.01	87.4777
SLC2A5	43.8	0.55	87.2813
TCL1A	5.72	0.04	86.6119
MMP11	136.33	1.74	85.4807
MMP13	1.19	0	83.349
TGIF2-C20orf24	3.36	0	82.9653
ABHD14A-ACY1	1.73	0	80.6072
KRT17	59.23	0.82	76.6067
SDS	85.32	1.21	76.0285
NETO1	5.11	0.11	74.3681
PTGDR2	9.15	0.12	73.9151
MMP9	241.89	3.64	72.8321
LOC283352	8.68	0	71.1838
LILRA4	11.6	0.16	69.8906
SULF1	160.22	2.5	69.8196
PADI2	19.2	0.29	69.5852
GAP43	1.63	0	68.3765
MMP10	1.58	0	68.3765
MMP23A	3.57	0	67.7708
TMEM200C	1.41	0	67.4407
MEDAG	8.92	0.13	66.7458
HPCAL4	0.5	0	65.5691
IL4I1	131.84	2.21	65.0044
KCNK12	1.9	0	64.6333
RNASE2	105.19	1.75	63.2347
CKMT1B	1.38	0	60.9276
ADGRF4	0.73	0	59.9544
ATP5J2-PTCD1	0.4	0	59.8702
HS3ST2	166	3.04	59.7333
LINC01551	3.44	0.05	59.6077
STRA6	71.72	1.32	59.0643
OVCH1-AS1	2.28	0	59.0186
SPP1	847.76	15.84	58.6717
SPATA12	0.93	0	57.147
LILRB4	289.96	6.72	56.4704
MS4A3	1.63	0	55.2755
CAMKV	0.7	0	55.2755
LRRTM1	0.97	0	54.3397
IGSF9	0.51	0	54.3397
COL10A1	18.53	0.37	53.8929
VAT1L	1.18	0.01	53.8743
LOC101927070	2.19	0.02	53.4435
IGDCC3	0.45	0	53.4039
TMIGD3	71.31	0.97	53.1715
COL17A1	1.59	0.03	52.4253
NTM	4.76	0.09	52.194
SYS1-DBNDD2	1.61	0	51.6634
CHRDL2	1.12	0	51.5323
CR2	2.8	0.05	51.397
ITLN1	2.5	0.01	51.0272
CLDN2	2.26	0.03	50.6576
RGS1	149.93	3.25	50.3153
ADGRE1	22.3	0.46	49.9197
PLN	6.76	0.12	49.5171
LIF	58.53	1.33	49.089
ADAM8	107.67	2.42	48.7829
SERPINE1	105.61	2.42	47.9462
APOBEC3H	11.55	0.22	47.8724
KRT16	1.13	0	47.7986
SPOCK1	1.25	0.02	47.7396
PADI4	5.74	0.11	47.4663
IL5	2.71	0	46.8534
CCR9	0.72	0	46.8534
CA9	4.18	0.07	46.7409
HBA1	404.36	9.37	46.6408
HBA2	1633.1	38.52	46.145
CNN1	5.22	0.1	45.589
LOC101927780	3.34	0.01	45.048
MMP7	79.18	1.89	44.9944
GPR150	1.45	0	44.9819
APOBEC3A_B	1.74	0	44.1396
EDN2	1.53	0	44.0461
GATA1	7.04	0.15	43.5961
FAM231C	3.37	0	43.1384
KRT5	4.24	0.09	43.1323
SCN10A	0.28	0	43.1103
CILP	9.79	0.24	42.7871
LINC01260	1.57	0	42.1745
LINC01281	0.93	0	41.2387
LOC100507600	0.88	0	41.2387
C6orf222	0.42	0	41.2387
IL1R2	8.11	0.19	40.615
PLD5	1.08	0.02	40.5208
LINC00698	0.88	0	40.3029
GUCA1A	0.84	0	40.3029
NPY4R	0.87	0	40.1906
GPR87	1.06	0	39.3671
GCNT3	0.69	0	39.3671
PADI1	0.37	0	38.4314
CNR2	4.98	0.12	38.0041
TREML1	6.37	0.17	37.9242
HABP2	1.62	0.03	37.7574
IFI30	4437.44	129.25	37.6848
RAD51L3-RFFL	0.36	0	37.271
LIPG	9.13	0.26	37.121
AZU1	1.82	0	36.5598
IGFBP5	78.14	2.36	36.4165
GABBR2	0.51	0.01	36.2132
CTLA4	29.33	0.9	34.9486
LOC101927412	4.53	0	34.6882
INSL3	2.03	0	34.6882
BDKRB1	1.12	0	34.6882
UGT2B11	0.82	0	34.6882
KIF5A	0.33	0	34.6882
AOC1	2.53	0.06	34.6096
KERA	0.53	0	34.5385
CCL7	6.76	0.15	34.431
DNAJC5B	28.4	0.88	34.3349
TNFAIP8L2-SCNM1	6.61	0.19	34.273
SIGLEC8	42.9	1.37	34.1219
NLRP7	0.85	0.02	34.0637
LAG3	35.53	1.13	33.9644
PLA2G7	154.47	5.02	33.8146
IL5RA	4.58	0.16	33.7504
PKD2L1	3.41	0.1	33.3187
CXCL9	465.09	15.49	33.0571
JAKMIP1	10.85	0.32	32.8436
NOG	0.69	0	32.7699
TMPRSS4	2.45	0.07	32.7383
SFRP4	6.43	0.2	32.4826
CACNG6	3.13	0.07	32.1928
ADORA3	61.02	2.07	32.0011
PPAPDC1A	0.85	0	31.8809
GFI1B	4.6	0.1	31.5109
CD8B	71.41	2.5	31.215
PDCD1	44.94	1.58	30.9876
KRT36	0.76	0	30.9451
VPREB3	16.54	0.48	30.9319
CRLF1	10.53	0.35	30.8059
CD177	1.84	0.05	30.7939
CR1L	0.66	0	30.6456
MYO1A	0.7	0.01	30.6134
HTR2B	3.11	0.09	30.6029
ALB	1.8	0.05	30.5142
MMP1	11.76	0.41	30.3142
SLC28A3	0.53	0.01	30.1826
TMEM176B	778.35	28.41	30.1555
CPLX2	0.24	0	30.0093
CD3E	130.41	4.8	29.701
TREM2	383	14.35	29.4999
CXCR5	5.05	0.18	29.469
NOX4	2.99	0.1	29.3817
BMX	0.96	0.02	29.3211
GAPT	32.49	1.21	29.2866
CXCR2P1	14.76	0.54	29.2706
ADGRE3	9.04	0.32	29.2558
RHOH	28.35	1.1	29.1843
HSF5	0.26	0	29.0735
FCMR	40.66	1.54	28.7252
DFNA5	42.1	1.61	28.5287
LGR5	0.22	0	28.1377
ANKRD22	9.77	0.37	28.0395
CFAP58-AS1	2.47	0.05	28.0288
SIT1	46.01	1.77	28.0003
KCNS2	1.14	0.03	27.9962
LSP1	354.36	14.03	27.748
MS4A1	19.83	0.78	27.6297
CST7	116.15	4.56	27.6273
FCGR1A	94.02	3.73	27.6021
IGFL2	3.53	0.11	27.5981
TTC24	2.5	0.08	27.5663
MGC12916	1.84	0.05	27.4899
HS3ST3A1	1.31	0.04	27.4672
NRXN2	8.23	0.32	27.3969
CXCR4	335.05	13.5	27.2238
ASIP	2.48	0	27.202
C20orf85	1.71	0	27.202
CEND1	0.66	0	27.202
MMP3	0.59	0	27.202
FEV	0.57	0	27.202
HTRA3	57.23	2.32	27.1169
HBB	1410.97	56.77	27.0949
UGT1A6	0.46	0	27.0897
LAPTM5	1203.92	49.01	27.0602
EPHB2	4.23	0.17	26.8988
CD8A	110.75	4.52	26.8833
CD2	131.53	5.37	26.7886
CD3D	159.79	6.31	26.7769
ZNF385A	114.03	4.72	26.7584
NIPAL4	0.68	0.02	26.7365
SELL	52.06	2.17	26.5359
SSTR3	0.9	0.03	26.3176
BEND4	0.37	0.01	26.3176
CLEC4D	1.18	0.03	26.3058
SLAMF1	23.13	0.94	26.2813
SIGLEC12	14.38	0.57	26.2754
FLJ22447	0.79	0	26.2662
TEKT5	0.65	0	26.2662
PNMA5	0.32	0	26.2662
LCK	84.52	3.54	26.1792
LGALS9C	0.6	0	26.1632
CDA	10.02	0.37	26.0963
UBASH3A	10.78	0.47	26.0934
LINC00242	0.41	0	25.9574
CCR7	17.24	0.73	25.9484
RNASE3	8.19	0.27	25.909
FCRL4	0.62	0.01	25.875
POTEJ	0.29	0	25.8638
CD300LB	10.47	0.43	25.854
GPR171	11.62	0.47	25.7675
CD5	27.1	1.15	25.725
FAM83A	0.63	0.01	25.5823
GDNF-AS1	0.65	0	25.3304
KLF1	0.63	0	25.3304
KRT14	0.62	0	25.3304
NGEF	0.34	0	25.3304
ADAMTS18	0.16	0	25.3304
KIR2DL4	3.02	0.11	25.2875
CCL24	18.67	0.56	25.1985
SUCNR1	8.78	0.36	25.1895
CHI3L1	115.62	5.04	25.17
IL2RG	239.98	10.55	24.9699
LYZ	4799.48	211.89	24.9222
FAM225A	6.26	0.27	24.7487
P2RY10	17.2	0.77	24.7341
KLHDC7B	5.62	0.24	24.7232
CDKN2A	6.35	0.25	24.6924
TIGIT	42.18	1.87	24.6253
ATP6V0D2	12.95	0.56	24.6135
KCNK15	2.37	0.09	24.5366
PLAU	78.42	3.47	24.5056
LEMD1	1.65	0	24.3946
LIPN	0.86	0	24.3946
HOXD10	0.53	0	24.3946
COMP	1.3	0.04	24.3592
P2RX5	15.39	0.7	24.3353
HNF4A	0.91	0.08	24.2517
CTSZ	2371.7	107.61	24.2461
SLC6A12	7.11	0.31	24.1548
PGLYRP1	2.49	0.06	24.152
XIRP1	1.88	0.08	24.0576
NFAM1	45.74	2.1	23.9878
FOXP3	28.34	1.3	23.9502
NCF1B	32	1.44	23.9348
SH2D1A	16.68	0.75	23.8837
LY9	32.66	1.5	23.8702
TNFSF11	2.46	0.09	23.8596
SLC27A2	2.7	0.12	23.7378
UGT2B17	0.98	0.03	23.7212
PRLR	0.65	0.02	23.6951
IL2RA	34.17	1.68	23.5648
SIRPG	36.88	1.58	23.5265
C19orf84	0.73	0	23.4588
IL22RA2	0.32	0	23.4588
PMFBP1	1.15	0.04	23.4231
LYPD1	8.22	0.4	23.3875
DPEP3	1.18	0.03	23.2905
KRT6A	0.36	0	23.2904
LGALS2	44.81	1.98	23.2723
CNTF	0.48	0	23.0564
CP	26.1	1.3	23.0163
NCF1	149.33	7.12	22.991
CEACAM4	2.75	0.09	22.9604
AIM2	14.75	0.68	22.922
TNNT1	6.57	0.28	22.8363
LOC653786	7.12	0.33	22.822
CORO1A	438.17	21.3	22.6215
HIST1H2AG	2.62	0	22.523
LY6D	1.3	0	22.523
RLN2	1.09	0	22.523
MS4A8	0.68	0	22.523
CD79B	41.04	1.9	22.5152
OSCAR	50.86	2.41	22.467
ELK2AP	1693.51	82.6	22.4424
LINC00520	0.96	0.03	22.429
GZMH	55.1	2.62	22.3521
TMEM176A	332.06	16.35	22.235
CRYBB1	5.01	0.2	22.1801
C4A	14.04	0.69	22.1697
GBP5	130.2	6.46	22.1637
IL27	3.15	0.11	22.1211
RASL10A	2.06	0.07	22.1211
SLC6A7	0.75	0.03	22.1211
SYT8	6.77	0.31	22.1208
TRAT1	6.21	0.28	22.1208
LTB	129.59	6.43	22.0526
CCR4	13.4	0.65	21.9348
IL21R	13.81	0.7	21.9343
PAX5	2.07	0.1	21.9332
SPHK1	35.21	1.75	21.8135
GZMB	89.49	4.46	21.779
OASL	16.5	0.84	21.7702
MPO	1.18	0.05	21.7658
FOXI1	0.36	0	21.5872
GATA4	0.9	0.04	21.5615
HLA-DQA1	1442.01	73.96	21.4495
ITGB2	441.33	22.67	21.4487
CXCR6	58.38	2.98	21.4014
PTPN7	53.7	2.79	21.3555
PTPRCAP	268.15	13.72	21.3508
BTBD11	1.45	0.05	21.3268
FXYD2	9.34	0.38	21.2995
CXCR3	31.68	1.62	21.2216
RTP5	1.03	0.03	21.1367
SLAMF8	142.44	7.44	21.0709
NCF1C	82.74	4.29	21.0691
TBC1D10C	73.74	3.74	21.0554
BLK	7.79	0.39	20.9014
ADGRG3	20.6	1.09	20.8198
USP30-AS1	15.91	0.79	20.7965
BASP1	73.49	3.88	20.7462
FGR	117.78	6.26	20.7272
NELL2	9.34	0.48	20.6564
MT1DP	4.3	0	20.6515
LINC01055	1.41	0	20.6515
HTR3A	0.4	0	20.6515
VTCN1	0.34	0	20.6515
PTPRN	0.99	0.04	20.6078
HTRA4	26.63	1.41	20.5565
CD6	30.46	1.62	20.5231
SH2D2A	24.52	1.3	20.4774
CST6	23.07	1.14	20.4503
KCNK10	0.34	0.01	20.4424
NEFH	2.19	0.11	20.4163
LILRA6	11.03	0.58	20.4097
CD7	81.2	4.34	20.4033
SIGLEC9	35.19	1.88	20.3837
ICOS	16.7	0.89	20.3758
GP1BB	0.93	0	20.352
GZMK	121.02	6.5	20.3088
NKG7	185.34	9.95	20.2965
BIK	2.08	0.06	20.2752
SERPINB2	0.92	0.03	20.2752
PLEKHS1	0.57	0.02	20.2752
ADGRE2	17.46	0.93	20.2555
LILRA3	6.49	0.32	20.2198
CYTIP	56.72	3.07	20.2194
GPR183	46.26	2.5	20.2152
HLA-DQA2	242.76	13.2	20.1548
CCL18	1443.8	78.51	20.1264
CD37	229.44	12.54	20.1238
FPR3	166.76	9.18	19.9917
ARL4C	69.32	3.81	19.9866
CCL3	48.34	2.59	19.948
SASH3	125.16	6.91	19.9362
CDX1	2.06	0.09	19.9014
AREG	11.7	0.61	19.8868
SIGLEC10	45.21	2.6	19.7947
LGALS17A	1.65	0.05	19.7884
SLAMF6	32.51	1.81	19.7873
SIGLEC7	37.02	2.06	19.7544
TMEM110-MUSTN1	0.54	0	19.725
SCARNA5	8.04	0	19.7157
LUCAT1	1.41	0	19.7157
AADACL2-AS1	1.33	0	19.7157
PAEP	1.12	0	19.7157
LINC01116	0.8	0	19.7157
RFX4	0.19	0	19.7157
BTLA	5.28	0.3	19.6043
TRAF3IP3	79.15	4.27	19.5082
GZMA	142.49	8.01	19.3731
FCER2	4.13	0.22	19.3422
ZNF831	4.03	0.23	19.3213
ZAP70	42.83	2.36	19.2963
HLA-DMB	1027.54	58.61	19.2734
NCR3	10.03	0.53	19.2677
IL24	0.47	0	19.2384
FERMT1	1.13	0.06	19.1395
C3orf80	1.65	0.08	19.0899
CD1B	2.6	0.12	19.0728
LINC00925	2.4	0.13	18.9943
CYP24A1	1.54	0.08	18.9649
TP63	1.69	0.09	18.9615
SMOC2	4.09	0.23	18.9195
C2CD4A	0.71	0.03	18.911
C11orf21	6.76	0.37	18.8997
FAM72C	2.94	0.15	18.8087
CRYBA4	1.06	0	18.7799
SMCO2	0.6	0	18.7799
SNTG2	0.38	0	18.7799
IRG1	0.34	0	18.7799
ANKRD20A1	0.2	0	18.7799
OSM	4.75	0.26	18.7184
LINC01094	7	0.41	18.6406
CCL4	135.14	7.86	18.6009
KCNK13	3.34	0.18	18.4754
PLA1A	30.67	1.84	18.4425
SOCS1	36.27	2.13	18.4167
PRG4	18.34	1.1	18.4131
CD79A	87.05	5.17	18.3588
PKP2	2.25	0.12	18.3209
KRT80	2.1	0.12	18.3134
CD28	8.15	0.48	18.2715
SLC29A3	56.49	3.49	18.2469
TKTL1	1.25	0.06	18.2441
CD53	396.91	23.93	18.224
RAB44	4.01	0.23	18.1838
LOC102723824	1.11	0.04	18.1257
SAMSN1	66.72	4.03	18.1204
PP12613	0.31	0	18.0406
CCR5	45.73	2.76	17.9987
CSMD2	0.4	0.02	17.9445
TFR2	1.63	0.08	17.9386
HUS1B	0.74	0	17.8441
OR3A2	0.69	0	17.8441
NEUROG3	0.58	0	17.8441
FZD10	0.2	0	17.8441
C3AR1	130.35	8.03	17.8404
FCGR3A	653.83	40.52	17.7224
ZNF683	7.1	0.42	17.6925
PSMA8	0.85	0.03	17.6906
SULF2	51.14	3.19	17.6713
HAVCR2	119.03	7.42	17.6423
EEF1A2	1.59	0.08	17.6227
ACAP1	53.36	3.33	17.5977
PRR15	0.92	0.03	17.5829
PIK3R6	15.11	0.9	17.5755
ABCG1	59.85	3.75	17.5408
CSF2RB	59.67	3.75	17.5213
CD70	10.28	0.59	17.5033
CD40LG	3.57	0.2	17.489
CH25H	13.82	0.84	17.4612
CPXM2	3.77	0.23	17.4383
DPEP2	34.6	2.17	17.4017
ISLR	137.26	8.36	17.3723
FCGR2B	139.98	8.86	17.3722
SIRPB1	22.52	1.34	17.3546
CST4	2.48	0.09	17.3492
HK3	52.79	3.36	17.2807
CCL19	107.72	6.75	17.2477
CD72	64.11	4.08	17.1562
GPR174	8.84	0.53	17.0818
B3GNT3	1.39	0.07	17.0094
DUSP2	34.19	2.19	17.0077
MAFB	132.56	8.59	17.0048
SKAP1	26.86	1.71	16.9994
CD19	10.27	0.64	16.9907
IL2RB	65.55	4.25	16.976
PTAFR	82.86	5.38	16.9516
CXCL14	8.91	0.56	16.9499
FNDC1	1.23	0.07	16.9187
SLC12A3	0.52	0.03	16.9134
MN1	2.54	0.16	16.913
LOC728739	1.37	0	16.9083
GPR15	0.55	0	16.9083
AIRE	0.28	0	16.9083
ABCB11	0.13	0	16.9083
IFNG	5.57	0.33	16.8791
CD48	199.65	12.98	16.8391
SENCR	1.83	0.09	16.8054
GRAMD1B	8.97	0.58	16.7953
ST18	0.45	0.02	16.794
NCF2	200.83	13.17	16.7823
CD247	44.02	2.87	16.7692
ISM1	6.24	0.39	16.7675
APOBR	35.9	2.35	16.7642
GPR152	0.47	0	16.7305
PARVG	49.74	3.27	16.683
CA12	1.4	0.09	16.6758
FEZF1-AS1	0.23	0	16.6744
TIFAB	13.13	0.83	16.6472
PKDCC	28.4	1.86	16.6412
PCED1B	31.04	2.07	16.6332
TYROBP	2127.13	139.39	16.6218
TFPI2	7.54	0.49	16.5995
CD69	22.93	1.5	16.5527
EPHX4	1.59	0.08	16.5257
CCDC109B	33.33	2.19	16.4815
SAMD3	5.45	0.39	16.4475
IGFN1	0.11	0	16.3984
EOMES	14.16	0.79	16.3568
SLC15A3	225.18	15.07	16.3388
WAS	74.08	4.97	16.3385
LTA	6.16	0.39	16.3318
DUSP10	19.9	1.31	16.3073
FCGR1B	11.69	0.86	16.2433
GPR68	12.99	0.87	16.2197
ARHGAP9	73.25	5.19	16.1989
PTPN22	18.69	1.28	16.1948
BCL11B	4.63	0.31	16.1947
CD86	72.84	4.97	16.114
ITGB7	41.48	2.79	16.093
TAGAP	24.58	1.66	16.0293
TNFRSF18	25.25	1.69	16.0286
LILRA2	16.78	1.13	16.0026
C5orf46	1.59	0	15.9725
LINC00944	1.29	0	15.9725
LOC101929715	0.8	0	15.9725
CRIP3	0.72	0	15.9725
LINC01583	0.23	0	15.9725
EYA1	0.16	0	15.9725
ZPLD1	0.16	0	15.9725
RDM1	1.45	0.08	15.9676
CTSW	69.49	4.75	15.9649
CECR1	172.78	12.14	15.9517
KLRK1	41.95	2.89	15.8459
GPR141	12.07	0.78	15.8398
AMZ1	0.97	0.06	15.8283
SPOCD1	2.84	0.18	15.8021
WT1	1.33	0.08	15.8005
CYBB	204.56	14.28	15.7902
LINC00892	5.31	0.31	15.7582
CCL20	3.99	0.22	15.7582
MYO1G	41.96	2.93	15.7429
ITGAD	4.68	0.32	15.7354
GTF2A1L	0.36	0	15.7199
CD300LF	61.95	4.33	15.7007
SLC35F3	0.71	0.04	15.6863
FUT7	2.67	0.17	15.6848
DKK2	2.49	0.16	15.6535
STAT4	15.75	1.1	15.6397
SLA2	15.86	1.1	15.6243
DCSTAMP	13.69	0.82	15.5877
HCST	268.05	18.61	15.5639
MANSC4	2.82	0.16	15.5511
LCP2	101.74	7.22	15.4838
RAC2	262.01	18.59	15.4834
CTSS	464.86	33.12	15.4781
CARD11	19.05	1.35	15.4661
RNASET2	353.77	25.13	15.4543
PLEK	129.11	9.21	15.4305
HLA-DQB1	1588.54	113.42	15.4144
ABI3	61.41	4.37	15.4114
LINC00239	4.16	0.21	15.4066
B3GAT1	1.34	0.09	15.3822
LY86	136.2	9.66	15.3738
MYBPC2	3.25	0.22	15.3481
HLA-DPB2	4.11	0.23	15.3439
GZMM	19.29	1.34	15.3428
CD74	12541.1	902.14	15.3091
RASAL3	36.89	2.66	15.2432
CD248	36.4	2.62	15.2411
FYB	56.09	4.04	15.2389
LY75-CD302	0.45	0.03	15.1947
TNFRSF8	5.56	0.4	15.1615
DOK5	3.3	0.21	15.1513
FIBCD1	0.84	0.05	15.1368
LGALS9	224.79	16.27	15.1231
ZSCAN5B	0.36	0	15.1116
SAPCD1	2.12	0.1	15.0961
LOC100505622	1.05	0	15.0368
UPK3A	0.73	0	15.0368
SLC22A20	0.35	0	15.0368
DYDC2	0.33	0	15.0368
EPX	0.2	0	15.0368
LOC101927229	0.18	0	15.0368
R3HDML	0.91	0	15.0274
CA7	0.35	0	15.0274
APBB1IP	53.47	3.91	15.0191
RAB37	25.2	1.84	15.0181
SYN1	2.11	0.14	14.9921
TLR8	17.05	1.25	14.9882
LPAR5	17.77	1.26	14.9803
KCNJ5	32.73	2.4	14.9171
GNGT2	17.4	1.24	14.9067
HLA-DRB1	4974.74	366.89	14.9052
CCL4L1	51.31	3.71	14.9006
S1PR4	37.29	2.73	14.8713
LOC101927164	0.45	0	14.8683
FAM92B	1.04	0.06	14.847
MEOX1	2.42	0.17	14.8463
PRF1	59.57	4.4	14.8374
TRIM6-TRIM34	0.15	0	14.8309
PTPN6	162.69	12.05	14.82
CD300A	82.69	6.09	14.7579
FAM24B	6.51	0.43	14.736
SLAMF7	128.58	9.87	14.7247
IL18BP	180.13	12.05	14.7234
F2RL2	1.71	0.12	14.6854
CHRNA6	0.52	0.02	14.6753
TMEM155	3.5	0.25	14.6704
COL1A1	293.53	22.08	14.6702
SIGLEC15	2.3	0.14	14.6525
ADGRG5	9.75	0.73	14.6497
UCP2	292.83	22.01	14.6299
DNASE2B	11.43	0.81	14.6204
MIAT	14.56	1.09	14.6177
RLTPR	9.47	0.71	14.6149
ITGAM	54.73	4.12	14.6062
SPI1	264.16	19.89	14.5872
FPR1	67.09	5.05	14.57
FOXL1	0.58	0.03	14.5673
SLA	112.54	8.41	14.5563
LY96	140.76	10.35	14.547
CD3G	25.51	1.9	14.5381
FAM159A	4.72	0.28	14.5153
KYNU	32.35	2.43	14.5118
RIPK3	22.99	1.72	14.501
FFAR2	13.63	1.02	14.4947
SRGN	884.03	67.02	14.4909
PIM1	71.51	5.43	14.4717
IGSF6	205.2	15.57	14.4314
THY1	103.68	7.9	14.4291
CD96	17.27	1.32	14.4202
POSTN	541.94	41.47	14.417
LOC254896	0.47	0	14.4098
CDH18	0.15	0	14.3724
NPL	143.81	10.88	14.3659
PRSS36	6.78	0.5	14.3594
LINC00426	6.01	0.43	14.3507
CD4	269.69	20.94	14.3209
CTSE	60.62	4.64	14.31
SULT1C2	5.14	0.38	14.3062
CYP27B1	4.49	0.33	14.3057
CD68	1659.17	128	14.2611
CPNE9	0.59	0.03	14.2446
P2RY8	31.37	2.42	14.2312
CD38	39.39	3.03	14.193
HSD11B1	61.62	4.77	14.1905
FAM78A	38.94	3.02	14.1795
DAPL1	8.43	0.54	14.1558
FASLG	12.06	0.92	14.1481
SERPINF1	239.6	18.64	14.1247
ITK	15.33	1.19	14.1086
SNORA48	428.19	0	14.101
AHSP	1.56	0	14.101
LINC01269	1.19	0	14.101
HBD	0.83	0	14.101
KLK1	0.71	0	14.101
OR2W3	0.64	0	14.101
OR52K2	0.55	0	14.101
SBSN	0.4	0	14.101
ANXA13	0.38	0	14.101
NEFM	0.16	0	14.101
GREM2	0.12	0	14.101
CD27	130.33	10.15	14.0706
BEAN1	9.91	0.73	14.0451
EVI2B	137.99	10.81	14.0291
IKZF1	39.05	3.12	14.0261
PIK3R5	46.08	3.67	13.9587
PYHIN1	11.94	0.9	13.9277
AMICA1	135.92	10.74	13.9252
HS3ST3B1	5.85	0.36	13.8712
LOC101928517	0.3	0	13.8483
CCL5	418.25	33.2	13.8412
SIRPD	1.73	0.08	13.8138
OTOF	0.23	0.01	13.8138
MYO1F	83.84	6.69	13.8087
GFI1	12.02	0.95	13.7967
RAMP1	46.1	3.59	13.7913
SP140	24.59	1.91	13.775
IFITM10	8.87	0.7	13.7738
LILRB2	42.98	3.46	13.7709
HLA-DRA	10187.6	814.39	13.7544
SLC16A3	205.2	16.41	13.7368
TYMP	434.23	34.31	13.7303
TBC1D2	51.01	4.09	13.7284
DENND2D	52.79	4.24	13.7027
EPSTI1	40.75	3.26	13.6957
ANPEP	18.98	1.52	13.6925
RCSD1	68.51	5.51	13.6768
FCRL3	5.34	0.42	13.6482
VSTM2L	5.56	0.43	13.6432
CEBPA	127.08	10.26	13.6317
IL10RA	152.58	12.34	13.619
GPR84	4.35	0.32	13.6149
CCR8	4.88	0.37	13.6107
ADAM28	17.01	1.08	13.6106
LPXN	114.89	9.25	13.5996
CCDC3	10.27	0.79	13.5975
FAM129C	3.75	0.28	13.544
C5AR2	3.2	0.24	13.5198
SYT7	3.74	0.3	13.5189
CD244	8.77	0.76	13.5132
SNX20	37.48	2.99	13.49
ITGAX	70.24	5.74	13.4898
OXER1	7.29	0.57	13.4691
CLEC4E	7.88	0.63	13.4669
ADD2	1.48	0.12	13.4529
ADAMTS14	3.38	0.27	13.4504
SIX1	0.65	0.04	13.4482
GEM	37.89	3.05	13.4413
PNOC	9.56	0.72	13.4397
MZB1	284.09	23.15	13.4158
RNASE6	203.44	16.63	13.4019
C5AR1	41.54	3.4	13.3851
CLNK	0.69	0.03	13.383
MAP4K1	37.31	3.08	13.3745
UNC5A	0.94	0.07	13.3737
HLA-DPA1	2839.81	233.69	13.3715
PILRA	155.53	12.55	13.3627
IDO1	151.06	12.45	13.3395
RARRES1	168.31	13.94	13.3099
IL18RAP	7.55	0.61	13.3084
HLA-DRB5	2342.66	193.48	13.3035
2019-09-01	54.44	4.5	13.2443
CD84	44.59	3.71	13.2418
UBD	338.56	28.03	13.2372
COL3A1	474.86	39.71	13.194
FUCA1	509.13	42.53	13.1836
FAM26F	137.76	9.97	13.1705
ASCL2	7.1	0.57	13.1696
LOC102724094	2.38	0	13.1652
LOC100507406	0.8	0	13.1652
FAM150A	0.46	0	13.1652
SUMO1P1	0.44	0	13.1652
AKR1C6P	0.37	0	13.1652
XKR3	0.3	0	13.1652
SMAD5-AS1	0.28	0	13.1652
HEMGN	0.22	0	13.1652
RASGEF1C	0.22	0	13.1652
CR1	11.88	1.02	13.1558
CLEC17A	1.61	0.13	13.1215
PRAM1	20.33	1.69	13.1149
TNFRSF12A	75.98	6.32	13.1132
ARHGAP15	40.44	3.38	13.0707
SLC47A1	25.31	2.13	13.0029
CYSLTR2	4.54	0.36	12.995
GALM	61.2	5.18	12.9819
CD300C	19.51	1.63	12.9738
PIK3AP1	50.9	4.32	12.9637
S100A4	921.98	77.11	12.9577
BFSP2	0.72	0.03	12.9523
INA	0.33	0.02	12.9523
GRM1	0.15	0.01	12.9523
DCHS2	0.14	0.01	12.9523
PTPRT	0.08	0	12.9523
CD180	30.78	2.61	12.9443
DIO2	4.92	0.41	12.9432
ADGRE4P	9.2	0.77	12.9223
IL1RN	14.6	1.22	12.9149
IGLL5	8343.18	713.41	12.9047
PAX9	0.53	0.03	12.8886
LILRB1	43.37	3.68	12.8797
CMKLR1	58.29	4.97	12.8783
SELPLG	120.25	10.29	12.8594
FSD1	1.26	0.09	12.858
VAV1	41.04	3.5	12.8546
OLR1	61.45	5.23	12.8509
C16orf54	17.89	1.52	12.8476
GPR132	14.02	1.14	12.8398
DOK3	69.08	5.84	12.8222
KLRC3	4.43	0.33	12.8147
FMNL1	73.53	6.32	12.8071
CLECL1	8.76	0.62	12.8048
CHST13	5.8	0.48	12.7907
PSTPIP1	30.98	2.65	12.7816
FCHO1	9.12	0.77	12.7774
CCDC64	14.19	1.21	12.7752
LOC100506585	10.88	0.93	12.7522
TARP	23.52	1.99	12.7164
IL32	320.24	28	12.6933
IGLL1	513.15	44.35	12.6699
PLA2G2A	2.92	0.2	12.6509
OLIG2	3.45	0.29	12.6321
FABP3	101.58	8.79	12.6294
LCP1	305.07	26.65	12.6221
KIAA0319	0.23	0.02	12.6089
ISG15	116.33	10.01	12.5999
SMCO4	56.82	4.9	12.5983
HBG2	1.1	0	12.585
CD52	1080.05	93.21	12.5779
CXCL10	217.85	19.01	12.5735
CSF2RA	72.51	6.4	12.5691
CLSTN2	0.66	0.05	12.5554
MYH6	0.07	0	12.5289
LINC01506	6.21	0.3	12.5215
LINC00540	0.49	0.02	12.5215
ITIH1	0.44	0.02	12.5215
TNFSF8	14.2	1.27	12.5119
TIMD4	2.3	0.17	12.5111
ACRBP	7.23	0.61	12.5067
AMPD3	28.19	2.49	12.4617
ITGAL	59.27	5.21	12.4494
AQP9	16.2	1.42	12.4492
MEP1A	1.13	0.09	12.4191
LGI2	4.65	0.41	12.392
FCRL2	5.69	0.45	12.3833
IL18	73.55	6.52	12.3214
FCGR1C	15.34	1.34	12.3196
S100A9	724.29	64.02	12.3158
LST1	158.41	14.4	12.2749
RARRES3	294.67	26.24	12.2665
AGAP2	12.46	1.08	12.2515
LINC00582	1.03	0	12.2294
XAGE2	0.93	0	12.2294
SLC8A1-AS1	0.51	0	12.2294
ARG1	0.32	0	12.2294
LOC285484	0.32	0	12.2294
RUNX1-IT1	0.32	0	12.2294
SLC38A4	0.11	0	12.2294
INSRR	0.1	0	12.2294
TREML2	1.88	0.16	12.1872
HLA-DPB1	760.89	68.91	12.1798
NKX3-1	1.51	0.12	12.1776
PCSK1N	8.36	0.71	12.1612
FLNC	1.79	0.16	12.1607
CTXN1	4.78	0.4	12.1568
IGLL3P	380.98	34.2	12.1499
GRIN3A	1.36	0.12	12.1444
CCRL2	28.04	2.57	12.11
C1QB	2903.94	263.3	12.1094
PHYHIPL	0.13	0	12.1078
FAM179A	2.13	0.18	12.1036
TMEM37	39.26	3.55	12.1027
CCL13	91.93	8.27	12.0989
BIN2	60.3	5.32	12.091
AIM1L	0.18	0.01	12.0908
SLC9A2	0.18	0.01	12.0908
OTOA	7.05	0.58	12.0799
PIK3CD-AS1	0.88	0.06	12.0493
NCF4	114.77	10.34	12.0306
FAM225B	1.05	0.09	12.0185
HRASLS5	1.03	0.08	12.01
LINC00528	2.26	0.19	11.9973
SYK	62.34	5.75	11.9914
EGR2	13.68	1.25	11.9863
KLHL6	33.15	3.05	11.9542
C1QC	1533.87	141	11.9479
CD40	87.16	8	11.9472
OLFML2B	21.01	1.93	11.9443
NCKAP1L	96.14	8.91	11.9178
TM6SF1	30.26	2.79	11.8987
WISP2	16.36	1.48	11.8755
PMEPA1	20.76	1.93	11.8493
LRRC61	10.55	0.96	11.8269
C2	192.55	18.48	11.7844
PLBD1	109.92	10.25	11.7828
MSR1	182.23	17.26	11.779
CYP1A1	0.58	0.04	11.7696
DNAJC12	2.87	0.24	11.7372
STXBP2	116.51	10.94	11.7138
LOC283710	11.9	1.07	11.711
ACTG2	6.09	0.54	11.7003
FDCSP	14.69	1.27	11.6625
TMSB15A	1.9	0.1	11.66
CREB3L3	0.37	0.02	11.66
BNC1	0.2	0.01	11.66
SLC37A2	92.98	8.8	11.6505
SLC38A11	2.75	0.25	11.6366
GCHFR	197	18.49	11.6145
IL21-AS1	0.39	0.03	11.5877
CADM3	3.98	0.37	11.5807
ZBED2	8.32	0.78	11.531
HLA-DMA	847.91	80.77	11.5284
NOS1AP	0.32	0.02	11.4898
CRIP1	303.94	28.58	11.4876
HCLS1	219.07	21	11.4783
ITGB2-AS1	7.64	0.7	11.469
BTK	50.85	4.87	11.4659
HLA-DOA	179.78	17.29	11.4634
HRH4	2.87	0.29	11.4588
DHRS9	28.3	2.86	11.4421
SLC31A2	101.77	9.79	11.4186
SYNDIG1	0.79	0.06	11.4079
HLA-DOB	26.12	2.49	11.4046
BHLHA15	10.37	0.92	11.4044
PRG2	4.28	0.38	11.4044
ANGPTL2	40.33	3.89	11.4008
LOC101927156	2.42	0.21	11.3906
FTL	46687.9	4499.55	11.3774
INPP5D	46.38	4.5	11.3482
RAB42	74.47	7.31	11.3424
FHAD1	2.12	0.2	11.3304
LILRB3	55.1	5.35	11.3288
ADAM23	0.46	0.04	11.3281
DOK2	106.87	10.37	11.323
XCL2	10.91	0.95	11.3228
IRF8	91.87	8.93	11.3223
DYSF	28.11	2.78	11.3101
PSD4	32.97	3.21	11.3053
CD226	6.13	0.58	11.2989
CARD17	1.4	0	11.2936
HIST1H2AE	1.03	0	11.2936
S100A5	0.74	0	11.2936
SLN	0.71	0	11.2936
PF4V1	0.69	0	11.2936
HCFC1-AS1	0.64	0	11.2936
TMEM14E	0.34	0	11.2936
PPP1R1A	0.23	0	11.2936
SERPINA9	0.23	0	11.2936
CDCP2	0.21	0	11.2936
ERICH6	0.2	0	11.2936
EDAR	0.09	0	11.2936
TMEM154	12.44	1.2	11.2711
C1QA	2030.49	197.92	11.2675
LINC01215	2.04	0.18	11.2657
CYTH4	65.71	6.42	11.2602
STAC3	18.23	1.73	11.2533
LAIR1	152.67	14.98	11.2372
HCK	123.73	12.14	11.2305
GJB3	0.44	0.03	11.2293
ERC2	0.14	0.01	11.2293
DNAH10	0.06	0	11.2293
SOWAHD	15.81	1.52	11.2288
LRRC25	51.81	5.08	11.2021
CASP1P2	0.91	0.07	11.2008
THBS4	8.24	0.81	11.1764
BLNK	29.29	2.9	11.1754
IL7R	39.36	3.89	11.174
APOC1	9793.2	951.03	11.1591
ARHGAP30	91.62	9.12	11.1359
GLI1	2.35	0.21	11.1304
MX2	14.67	1.45	11.036
CD101	7.73	0.76	11.0353
THEMIS	4.86	0.47	11.0294
PTPRC	136.11	13.69	11.0267
ALOX15B	41.66	4.17	11.0224
CCL21	236.76	23.53	11.0104
F2RL1	8.11	0.8	11.0019
ZNF296	4.33	0.41	10.996
SFRP5	1.05	0.08	10.9936
TNC	19.74	1.98	10.9826
MS4A6A	391.41	39.72	10.9497
HBG1	0.94	0	10.938
CALCR	0.38	0.03	10.9302
SELE	0.35	0.03	10.9302
DEGS2	2.24	0.2	10.919
TACR1	0.9	0.18	10.9154
TMEM52B	3.09	0.3	10.9109
PGBD3	0.8	0.06	10.908
LINC00152	93.7	9.41	10.9051
GATA3	7.77	0.77	10.8986
IL12RB1	32.4	3.63	10.8956
LXN	126.9	12.77	10.8878
FGL2	77.82	7.88	10.8859
CD14	409.43	41.48	10.8715
TNFRSF1B	149.73	15.23	10.8365
CYP1B1	39.29	4	10.8075
SLC7A7	127.34	12.59	10.7925
MCHR1	1.2	0.11	10.7826
GLIPR2	73.51	7.41	10.7709
CHST1	6.35	0.64	10.7695
GDNF	0.79	0.07	10.7612
SCARNA13	4.33	0	10.7509
NAPSB	66.44	6.77	10.7456
CETP	6.71	0.65	10.7042
EPB41L3	31.07	3.2	10.6986
TBX21	5.74	0.58	10.6965
ENTHD1	5.05	0.51	10.6622
ACSM5	4.86	0.49	10.6098
RASL11B	1.75	0.16	10.6068
PRDM8	3.24	0.36	10.6031
KCNQ5	0.81	0.07	10.5954
LOC101927482	2.89	0.27	10.5775
GNA15	29.54	3.06	10.5744
TIMP1	5725.96	594.26	10.5693
APOBEC3A	12.42	1.32	10.5679
TBXAS1	81.92	8.53	10.5654
DSC2	9.8	1.02	10.5594
SIRPB2	19.98	2.11	10.5494
BGN	386.95	40.41	10.5483
PRKCQ	9.33	0.96	10.5384
CLEC7A	69.11	5.75	10.5308
WDFY4	14.94	1.56	10.5139
P2RY14	10.54	1.06	10.4948
IQGAP2	37.97	3.69	10.4867
ST14	48.83	5.13	10.4754
CLEC10A	91.72	9.62	10.4554
DOCK8	41.9	4.39	10.4544
SYTL3	14.95	1.69	10.4519
AIF1	570.42	59.44	10.4147
INHBB	6.63	0.69	10.3936
INHBA	7.14	0.74	10.3805
TSPAN32	4.44	0.44	10.3749
DLEU7	1.78	0.17	10.3747
LINC00158	0.62	0.04	10.3677
LOC101929733	1.29	0	10.3578
C11orf97	0.84	0	10.3578
SAMSN1-AS1	0.53	0	10.3578
PRG3	0.51	0	10.3578
CTRB2	0.49	0	10.3578
OR10P1	0.46	0	10.3578
GPR31	0.45	0	10.3578
C4orf47	0.44	0	10.3578
LOC101927416	0.33	0	10.3578
DLX5	0.28	0	10.3578
SHISA8	0.28	0	10.3578
OR51B5	0.27	0	10.3578
MRGPRF-AS1	0.25	0	10.3578
DDX11L10	0.24	0	10.3578
KIR2DL3	0.24	0	10.3578
LOC101928140	0.21	0	10.3578
PGLYRP2	0.2	0	10.3578
C15orf53	0.19	0	10.3578
LINC01529	0.17	0	10.3578
MPPED1	0.15	0	10.3578
ESRRB	0.12	0	10.3578
LHCGR	0.12	0	10.3578
UGT2A3	0.12	0	10.3578
GDF6	0.1	0	10.3578
DIRAS2	0.08	0	10.3578
STXBP5L	0.04	0	10.3578
ZBED6CL	10.69	1.13	10.3144
LRRN1	2.28	0.23	10.2907
SYT12	1.17	0.11	10.2843
HAAO	19.71	2.07	10.2788
GSG2	3.68	0.38	10.2659
ARL11	7.36	0.78	10.2556
OCIAD2	58.35	6.33	10.2388
SLITRK4	0.3	0.03	10.2371
SUSD3	27.64	2.88	10.2339
NLRP2	0.63	0.06	10.2068
CLEC2B	35.51	3.82	10.1892
AKNA	45.23	4.9	10.1881
LOC100996286	2.53	0.31	10.1709
KCNAB2	110.21	11.69	10.1645
PRDM1	15.12	1.61	10.161
CACNA2D4	3.02	0.32	10.1531
DOCK2	48.62	5.29	10.1409
ISLR2	4.23	0.47	10.1144
MIR4435-2HG	75.19	7.82	10.1023
CAMP	4.57	0.43	10.1008
IL31RA	0.98	0.1	10.1008
ALOX5AP	220.12	23.9	10.0951
APOL4	54.64	6	10.0939
TGFB2-OT1	0.28	0	10.0771
BAAT	1.73	0.18	10.0645
TLR1	18.55	2.02	10.0627
SCIMP	41.37	4.52	10.0546
C10orf128	73.27	8.04	10.0459
CRABP2	16.94	1.81	10.0456
KLRB1	37.94	4.07	10.0423
UCHL1	14.29	1.52	10.0394
AOAH	58.09	6.38	10.0259
KCP	0.66	0.06	10.0245
TLR9	1.84	0.19	10.0228
TMC8	41.95	4.61	10.0222
ZBP1	15.78	1.55	10.0145
TMEM63C	0.89	0.09	10.007
EMB	24.02	2.64	10.0032
PTGER3	0.27	0.05	10.0009
CHRNA1	29.27	3.16	9.97975
RAB20	87.03	9.58	9.9729
LY6H	4.52	0.43	9.96764
TFEC	10.06	1.11	9.96482
CD1A	0.85	0.07	9.95781
PPP1R3G	4.09	0.43	9.94523
H19	101.81	10.68	9.94481
ALAS2	0.44	0.03	9.93699
SEMA6B	30.29	3.36	9.93047
F2R	49.33	5.48	9.91557
VNN1	3	0.32	9.91248
GOLGA6L22	0.09	0	9.89931
CXCL3	3.19	0.32	9.88458
LGMN	783.2	87.22	9.88351
TRPM8	0.66	0.07	9.87895
PTGS1	22.79	2.57	9.82422
NTNG2	2.29	0.24	9.82137
P2RY13	22.84	2.55	9.81289
CHRM3-AS2	1.67	0.14	9.81116
PTCRA	6.09	0.75	9.80755
ARL17B	7.57	0.6	9.80213
DENND1C	29.66	3.36	9.78434
SLC46A3	23.08	2.59	9.78415
DCANP1	10.49	1.17	9.75995
HACD4	18.44	2.05	9.75341
WDR86-AS1	2.65	0.24	9.75065
TMEM158	12.74	1.42	9.73519
HCAR3	3.29	0.35	9.73459
TPTEP1	2.14	0.21	9.73176
CTSC	1108.12	119.66	9.71886
TNNI2	14.72	1.59	9.70469
DAPP1	16.17	1.83	9.70068
HENMT1	15.01	1.57	9.69389
FOSB	3.92	0.44	9.69198
PNMA3	1.61	0.17	9.68365
PCED1B-AS1	6.36	0.71	9.68095
PRR16	6.1	0.67	9.67698
LOXL2	17.96	2.04	9.66877
TNFRSF13C	4.37	0.45	9.66272
SLC17A9	17.89	2.03	9.6536
KLHDC7A	0.75	0.08	9.65315
SNAI3	9.19	1.03	9.6262
CLEC4A	33.26	3.77	9.62212
PLEKHO1	147.18	16.94	9.61671
GIMAP5	113.24	12.95	9.61296
IFITM1	444.22	50.5	9.61197
PDPN	17.03	1.94	9.60584
HEYL	10.26	1.17	9.60146
CLDN14	0.66	0.05	9.59238
HMOX1	256.46	29.43	9.58433
ADAP2	35.32	4.05	9.57749
PHOSPHO1	4.22	0.48	9.57132
ECEL1	1.63	0.18	9.56576
LINC00539	5.98	0.84	9.56108
DRD5	1.27	0.13	9.55861
ELF4	26.31	3	9.54606
ACY3	1.02	0.09	9.53139
SCG5	3.03	0.32	9.50721
ANTXRLP1	0.74	0.06	9.50623
BPI	0.44	0.03	9.50623
NOVA1	0.41	0.01	9.50623
PM20D1	0.36	0.02	9.50623
KY	0.13	0.01	9.50623
LAIR2	10.35	1.12	9.50557
DHRS3	89.23	10.33	9.49229
SECTM1	45.73	5.3	9.48046
IPCEF1	3.91	0.45	9.45225
SYTL1	25.44	2.96	9.44722
BZRAP1-AS1	9.43	1.08	9.43953
LFNG	46.67	5.62	9.42702
RASGRP1	11.33	1.31	9.42628
WFDC10B	0.71	0	9.42206
ELFN1-AS1	0.65	0	9.42206
OBP2A	0.63	0	9.42206
LOC101929125	0.61	0	9.42206
C9orf135	0.55	0	9.42206
PPP1R14D	0.55	0	9.42206
LOC646268	0.48	0	9.42206
CAPSL	0.4	0	9.42206
PDZD9	0.35	0	9.42206
C6orf118	0.19	0	9.42206
KCNJ4	0.18	0	9.42206
LOC101929470	0.18	0	9.42206
ZFP57	0.18	0	9.42206
LOC101927438	0.17	0	9.42206
SPATA21	0.17	0	9.42206
MIR31HG	0.16	0	9.42206
SOX21	0.11	0	9.42206
UGT3A1	0.11	0	9.42206
NPAS4	0.1	0	9.42206
ZBBX	0.1	0	9.42206
C9orf84	0.07	0	9.42206
GIMAP4	119.82	14.01	9.40473
ISG20	59.61	6.32	9.39742
THEMIS2	128.73	14.31	9.38815
S100A8	233.54	26.98	9.37686
ANXA8L1	5.89	0.67	9.37217
ABLIM2	1.05	0.12	9.35984
RASSF2	58.49	6.97	9.34203
RASSF4	136.97	16.15	9.34069
RNF157-AS1	0.36	0.02	9.3167
ARRB2	166.66	19.66	9.31474
MS4A4A	176.79	20.96	9.31357
FCN1	82.93	9.77	9.30531
ALOX5	101.22	11.99	9.29495
CDCA2	2.23	0.25	9.28386
NALCN	0.34	0.04	9.28255
ALPK2	0.32	0.03	9.28255
KRT16P2	1.08	0.1	9.2659
HLA-B	6301.58	749.46	9.25372
ENKUR	0.35	0.05	9.25162
MFAP2	44.13	5.21	9.22848
CUZD1	0.9	0.09	9.22167
TNF	8.22	0.96	9.21153
MSC	13.61	1.61	9.2081
IRF5	43.68	5.18	9.20534
TMEM150B	23.7	2.73	9.20487
TNFRSF17	28.61	3.37	9.20322
LINC00623	1.1	0.12	9.19789
FBP1	198.73	23.86	9.18862
TMEM255A	23	2.77	9.18422
ME1	15.25	1.82	9.18055
EPHX3	1.93	0.21	9.15554
FGD3	33.57	4.01	9.14618
LAT2	33.06	4.03	9.1361
SIGLEC14	15.92	1.9	9.13286
MUC4	3.51	0.19	9.11706
EYA2	4.16	0.49	9.09749
GAL	4.54	0.49	9.09273
FAM72A	3.14	0.36	9.08551
LOC102724323	2.57	0.17	9.07547
SEPT7-AS1	1.21	0.09	9.07547
LOC399815	0.36	0.02	9.07547
GGN	0.35	0.02	9.07547
MYLK2	0.26	0.02	9.07547
KIRREL3	0.19	0.01	9.07547
SIGLEC5	3.2	0.37	9.06436
JSRP1	6.03	0.7	9.03168
OLFM2	7.36	0.89	9.0121
LINC01150	2.59	0.28	8.97626
PDCD1LG2	22.98	2.81	8.97347
NAT1	7.31	0.85	8.97246
LMNB1	33.83	3.88	8.96868
PIM2	125.88	15.46	8.95798
HLA-DRB6	200.4	24.59	8.94692
C12orf79	1.65	0.2	8.93189
PSMB9	187.1	22.97	8.92896
CFAP54	0.19	0.02	8.92562
PLAUR	128.91	15.7	8.92524
SPDEF	0.84	0.08	8.92202
HLA-DQB2	68.74	8.44	8.91663
PIK3CG	12.55	1.54	8.91416
MMP25	9.69	1.19	8.89528
ZNF883	1.18	0.13	8.85978
HPSE	6.14	0.76	8.85892
TNFAIP8L2	44.76	5.52	8.85556
GNLY	50.34	6.11	8.84969
PTGER2	7.6	0.93	8.84402
C1orf162	123.41	15.34	8.84249
COL5A2	42.58	5.31	8.83662
CCDC169-SOHLH2	0.12	0	8.83251
TMEM156	8.51	1.04	8.8285
CLEC5A	3.31	0.4	8.8265
WNT5A	4.45	0.52	8.82398
FAM110A	14.63	1.8	8.81509
CSTA	46.66	5.75	8.8075
TMEM71	6.69	0.84	8.79653
TRIM14	42.03	5.27	8.79478
PLIN2	198.66	24.92	8.77406
TMEM200A	6.61	0.82	8.76966
TLR7	14.76	1.85	8.75083
MNDA	72.56	9.11	8.74047
SERPINA1	314.08	39.63	8.72086
CAPN6	1.73	0.21	8.71371
BCAS4	7.78	0.96	8.69904
LTF	5.24	0.65	8.69692
C20orf197	1.31	0.04	8.69208
KIR3DL2	0.63	0.06	8.69208
SDR42E1	1.7	0.2	8.69139
CXCL16	214.89	27.11	8.6792
AXL	36.69	4.72	8.67103
KCNMB1	6.74	0.83	8.66958
MMP2	234.46	29.49	8.66791
HVCN1	41.6	5.26	8.65796
COL8A1	27.48	3.48	8.64618
UTS2	1.64	0.13	8.64471
CACNA1C-AS2	1.58	0.11	8.64471
CATSPER3	0.56	0.04	8.64471
LOC284648	0.5	0.04	8.64471
IL4R	60.68	7.68	8.64466
RGS9	2.03	0.26	8.63617
TMSB15B	5.34	0.6	8.62684
PPAP2C	5.21	0.62	8.61301
EGLN3	27.84	3.55	8.60298
RIMBP3	1.54	0.19	8.60242
CCL23	16.44	2.15	8.59723
TMEM119	37.1	4.74	8.59379
ACPP	5.33	0.66	8.59065
ICOSLG	19.86	2.59	8.58546
RBP1	77.02	9.68	8.57872
LRMP	20.51	2.65	8.57842
BANK1	8.37	1.1	8.57059
HIST1H1C	34.21	4.3	8.56669
LINC01605	2.08	0.35	8.56378
CCDC88B	30.94	3.99	8.5367
CSF1R	135.31	17.5	8.534
LOC101930071	13.97	1.37	8.5077
TSPAN1	8.84	1.12	8.49786
CAMK4	2.63	0.32	8.4943
ICAM3	74.16	9.6	8.48815
SNORD15B	113.14	0	8.48627
RPL23P8	0.84	0	8.48627
LINC01526	0.77	0	8.48627
GTSCR1	0.68	0	8.48627
FAM27L	0.67	0	8.48627
TMEM114	0.66	0	8.48627
DEFA4	0.65	0	8.48627
IGFL3	0.59	0	8.48627
LOC101927311	0.48	0	8.48627
HIST1H1E	0.47	0	8.48627
RHOXF1P1	0.47	0	8.48627
LINC00881	0.46	0	8.48627
LOC105748977	0.45	0	8.48627
CCL25	0.34	0	8.48627
TAGLN3	0.27	0	8.48627
KLK13	0.26	0	8.48627
SPATA4	0.26	0	8.48627
CTD-2297D10.2	0.2	0	8.48627
DAO	0.2	0	8.48627
KISS1R	0.19	0	8.48627
TM4SF4	0.19	0	8.48627
GC	0.17	0	8.48627
ADAD2	0.15	0	8.48627
LINC00939	0.15	0	8.48627
FAM19A4	0.14	0	8.48627
LOC100996351	0.13	0	8.48627
SLC27A6	0.11	0	8.48627
TEX11	0.1	0	8.48627
MCF2	0.08	0	8.48627
NEFL	0.08	0	8.48627
LRRC55	0.05	0	8.48627
LILRA5	19.49	2.61	8.48293
GTSF1	3.41	0.38	8.48206
P2RY11	24.06	3.1	8.48062
ZSCAN5A	2.89	0.36	8.46908
GCH1	17.32	2.4	8.46699
SH3BP1	49.31	6.43	8.43343
BCAT1	10.27	1.34	8.43286
LOC102724297	6.45	0.79	8.41948
ITPRIP	16.37	2.14	8.41526
KLK6	0.75	0.07	8.41231
LRRN2	2.37	0.3	8.4054
LOC100506388	2.09	0.23	8.40425
POU2AF1	38.44	5.04	8.39403
ZNF469	2.29	0.3	8.39159
GADD45G	52.97	6.89	8.39084
GLT1D1	1.53	0.19	8.38906
BANCR	12.63	1.57	8.38611
C19orf38	16.42	2.11	8.38297
ZG16B	5.54	0.67	8.3494
CATSPER1	0.85	0.1	8.32796
LAMP5	3.43	0.47	8.31875
LOC100129083	0.5	0	8.31783
AFAP1-AS1	0.2	0.02	8.31658
CDCA7L	10.39	1.38	8.31085
POU2F2	7.79	1.13	8.30887
S100A16	143.69	18.96	8.30754
FOXD1	0.47	0.05	8.306
TAGLN	198.65	23.89	8.30223
VNN2	18.15	2.46	8.30094
FCRL6	4.79	0.61	8.30089
FAM43B	1.3	0.16	8.30078
COL7A1	5.05	0.67	8.29114
TMSB4X	12447.4	1641.73	8.27877
HN1	92.48	12.26	8.27327
TOX	10.24	1.36	8.2729
RASGEF1A	4.59	0.6	8.27287
GLRX	115.37	15.2	8.27279
LOC606724	6.18	0.72	8.2717
SLC12A8	5.43	0.7	8.27116
ASPN	8.33	1.1	8.26964
MMP19	20.26	2.68	8.26766
KRT16P1	0.4	0.03	8.26091
SNX24	15.46	2.04	8.26039
TFEB	44.84	5.78	8.25895
MIR155HG	10.19	1.33	8.25781
GLIPR1	29.45	3.93	8.25549
TENM4	2.69	0.36	8.25227
IL1B	5.36	0.69	8.24499
APOBEC3G	58.59	7.81	8.23811
ALDH1A2	0.52	0.06	8.23484
TESPA1	7.77	1.03	8.2338
KRT86	0.33	0.02	8.22688
JAK3	30.1	4.03	8.22
SELM	134.16	17.78	8.21784
CA3-AS1	1.52	0.12	8.21396
KRTAP5-9	0.62	0.05	8.21396
LOC729950	0.29	0.02	8.21396
SLC2A9	14.57	1.93	8.20935
RPS6KA1	91.93	12.17	8.20484
CPZ	22.04	2.91	8.20239
TAP1	253.36	33.88	8.20231
BATF3	9.3	1.2	8.1937
INHBE	0.37	0.03	8.19053
DEF6	53.44	7.17	8.18878
PLEKHN1	1.57	0.19	8.18738
ADAM19	16.98	2.28	8.1871
ASGR1	3.86	0.52	8.1856
SEMA4A	42.42	5.78	8.15994
ARHGDIB	738.7	99.53	8.15527
OAS2	37.72	5.08	8.15068
FCRL1	1.91	0.25	8.1496
GRPR	0.39	0.04	8.13254
ARHGAP25	61.8	8.4	8.12374
WISP1	17.71	2.41	8.12304
APCDD1L	0.94	0.12	8.12046
SLC38A1	17.18	2.52	8.1176
TNIP3	2.13	0.28	8.09876
PRKCQ-AS1	3.21	0.42	8.08919
P2RY6	10.34	1.38	8.08213
KLRC4-KLRK1	3.07	0.4	8.07814
STEAP3	25.92	3.55	8.07747
MXRA5	14.97	2.04	8.0712
GBAT2	6.81	0.77	8.07037
MORN3	1.71	0.2	8.07037
DNAH8	0.16	0.02	8.04449
TLR4	33.99	4.69	8.03108
PRKCB	25.13	2.71	7.99139
LILRA1	4.31	0.63	7.96975
KBTBD8	2.34	0.32	7.96588
TRIM32	8.3	1.14	7.95881
VDR	19.61	2.74	7.95504
ANK1	0.64	0.13	7.9478
MPP1	128.76	17.84	7.9462
WNT10A	4.49	0.61	7.94127
CADM2-AS2	0.44	0	7.93416
CUX2	0.29	0.04	7.91885
HOXD9	3.56	0.48	7.91101
CYP2S1	5.96	0.82	7.8986
SLC6A6	33.57	4.77	7.89632
SYCE1	1.13	0.13	7.88623
LOC101928834	1.05	0.12	7.88623
KIF21B	11.93	1.67	7.88135
MCTP1	8.31	1.16	7.8764
CRTAM	7.73	1.21	7.8719
ORC1	2.54	0.35	7.86269
RAB19	1.22	0.12	7.85277
ASCL1	0.4	0.04	7.85277
HIST2H2BA	1.98	0.17	7.85191
ABCA1	17.28	2.43	7.8465
NMNAT2	0.48	0.06	7.83321
GIMAP1	25.31	3.56	7.82297
DERL3	80.56	12.22	7.81758
ETV7	13.23	1.82	7.80963
RGPD1	1.66	0.23	7.78773
PVALB	1.56	0.12	7.7832
FAM81B	0.43	0.03	7.7832
USH1C	0.26	0.02	7.7832
GPR158	0.3	0.04	7.78248
PPAPDC3	2.41	0.32	7.78228
FLI1	41.14	5.83	7.7814
LEP	0.74	0.09	7.76738
HES2	3.52	0.49	7.76251
IRF1	125.09	17.79	7.7526
C10orf54	61.92	8.81	7.7513
ZBTB7C	1.57	0.21	7.75049
KCNH2	1.73	0.28	7.74197
LYN	48.19	6.88	7.73624
PLCB2	44.4	6.29	7.71261
UGT2B7	1.9	0.25	7.70133
MATK	10.4	1.46	7.7002
TNFAIP3	41.51	5.95	7.69301
PPM1M	85	11.78	7.69117
CD33	34.35	4.54	7.68822
COL1A2	295.91	42.52	7.67799
ARID5A	57.65	8.27	7.66066
LY6K	0.81	0.09	7.64209
LAX1	11.48	1.73	7.62881
GIMAP1-GIMAP5	27.63	3.98	7.62564
ELMO1	18.17	2.53	7.62291
SERPING1	623.21	90.35	7.61915
MFNG	66.23	9.6	7.59688
ADORA1	3.01	0.42	7.5815
DHDH	7.63	1.07	7.58129
ANAPC1P1	0.15	0	7.57856
NKILA	0.64	0.08	7.57696
HLA-A	4955.62	719.95	7.57624
C4BPB	1.13	0.11	7.573
DCAF4L1	0.19	0.02	7.573
MPEG1	108.47	15.82	7.56115
LOC101927069	2.2	0.3	7.55297
PAGE5	0.68	0	7.55049
TOMM20L	0.58	0	7.55049
SPRR1A	0.52	0	7.55049
LINC01515	0.5	0	7.55049
LOC101928461	0.42	0	7.55049
LINC00305	0.36	0	7.55049
KRTAP5-7	0.34	0	7.55049
GSC	0.24	0	7.55049
THEG	0.23	0	7.55049
REG4	0.21	0	7.55049
LOC101928034	0.2	0	7.55049
FLJ33534	0.17	0	7.55049
LRRC14B	0.17	0	7.55049
MESP2	0.17	0	7.55049
KCNA10	0.14	0	7.55049
CPA5	0.13	0	7.55049
DMRT3	0.12	0	7.55049
LOC100505736	0.12	0	7.55049
ZPBP2	0.12	0	7.55049
ALOX12B	0.1	0	7.55049
LOC728084	0.1	0	7.55049
SLC22A7	0.1	0	7.55049
C12orf40	0.09	0	7.55049
CYP4F11	0.09	0	7.55049
GUCY2EP	0.09	0	7.55049
MUC13	0.09	0	7.55049
SOX30	0.09	0	7.55049
OR51E1	0.08	0	7.55049
LINC00890	0.05	0	7.55049
ANKRD26P1	0.04	0	7.55049
FER1L6	0.04	0	7.55049
IGF2BP1	0.03	0	7.55049
MUC17	0.02	0	7.55049
CYBA	1033.84	150.17	7.53002
KRT1	1.11	0.15	7.52829
CTSD	6120.58	896.47	7.52189
RELT	22.69	3.31	7.51621
CXorf21	13.52	1.96	7.51378
HPGDS	18.31	2.66	7.50339
PLXDC2	25.07	3.69	7.50255
TNFAIP8	38.13	5.58	7.50029
NTRK2	0.17	0.02	7.47191
CLEC4C	2.05	0.25	7.46213
FRMPD3	0.3	0.04	7.46213
TMEM59L	2.19	0.3	7.45831
TCF7	18.36	2.7	7.45253
CCR1	70.4	10.4	7.45212
GALNT6	9.04	1.33	7.44572
MRGPRF	5.64	0.82	7.43025
AIM1	13.44	1.99	7.42834
RELB	31.65	4.68	7.42646
ACP5	1133.39	170.36	7.41495
LOC646626	0.34	0	7.41012
STX11	10.92	1.62	7.40809
STAP1	6.22	0.9	7.40803
NNMT	88.12	13.12	7.38017
MYBL2	10.98	1.63	7.37354
CD24	74.29	11.51	7.36638
JPH4	1.52	0.22	7.3601
S100A2	4.43	0.62	7.35945
LOC101929723	0.93	0.08	7.35244
DRC1	0.24	0.02	7.35244
APOB	0.04	0	7.35244
CDH2	1.6	0.23	7.35087
FAIM2	1.57	0.23	7.33692
CD163	190.64	28.67	7.31938
FPR2	4.68	0.69	7.31912
GIMAP2	56.85	8.52	7.31563
OPCML	0.14	0.02	7.31002
RPPH1	34.08	4.74	7.30396
BCORP1	0.88	0.12	7.29629
LOC102724279	3.41	0.37	7.29323
CACNA1C-AS1	0.42	0.05	7.29323
MUC16	0.02	0	7.29323
STAG3	4.35	0.64	7.28076
VAV3	8.45	1.33	7.26745
GAB3	10.43	1.63	7.26324
LGALS1	2271.08	340.91	7.2558
ZCCHC18	2.52	0.27	7.25361
PTPRO	12.22	1.6	7.24865
NCR1	1.54	0.23	7.24801
YPEL4	6.86	1.02	7.24062
ZNF804A	0.4	0.05	7.23699
SLC17A7	0.75	0.1	7.22919
SMAP2	137.79	20.47	7.22309
LYL1	25.34	3.86	7.19811
JUNB	159.03	24.34	7.18988
BMS1P20	150.49	23.07	7.17914
SLC2A6	16.95	2.64	7.1707
YBX3	77.47	11.9	7.1442
NPTX1	0.68	0.1	7.14258
ASF1B	14.89	2.28	7.13438
LOC101927243	6.18	0.88	7.13428
TUBA4A	43.01	6.64	7.13012
MROH7	1.61	0.24	7.1249
PLAA	10.42	1.61	7.11682
C1orf127	2.23	0.33	7.11545
CCL8	12.95	1.97	7.11095
ATF5	143.19	22.41	7.10582
BLACAT1	0.72	0.1	7.10062
SVILP1	0.69	0.08	7.09946
HMGA2	7.56	2.27	7.09849
APOL1	113.41	17.65	7.0951
CAMK1D	14.26	2.35	7.09216
GPR35	4.29	0.56	7.08827
GIMAP6	62.59	9.73	7.08472
GGT1	14.86	2.32	7.0808
FOLR2	206.01	31.95	7.0806
EGFL6	5.66	0.87	7.07638
NOD2	8.68	1.33	7.07473
ACTR3C	1.65	0.24	7.07399
SLCO2B1	185.3	28.87	7.0733
TTBK1	0.21	0.03	7.06898
UNC5CL	3.79	0.58	7.06206
AMIGO2	11.25	1.76	7.05922
WFDC3	1.41	0.18	7.0576
IL3RA	32.99	5.08	7.0539
CTAGE6	0.09	0	7.04517
S100P	8.45	1.2	7.03856
CLSTN3	36.16	5.66	7.03371
GPR34	34.05	5.34	7.0241
DES	1.13	0.16	7.0201
SERPINB8	12.11	2.04	7.01885
TNNC2	1.7	0.19	7.01346
GTSF1L	1.32	0.16	7.01346
CEACAM3	0.72	0.11	7.01346
GCSAM	2.46	0.38	7.01038
RASA4B	30.8	4.84	7.0029
SIGLEC1	32.01	5.04	6.99681
MYCL	6.11	0.94	6.99344
STON1-GTF2A1L	0.27	0.03	6.99178
SLC9A3R1	71.08	11.18	6.99018
C10orf55	0.69	0.09	6.98912
KCTD17	26.28	4.2	6.98764
CDKN2B-AS1	0.73	0.12	6.98466
ILDR1	2.01	0.31	6.97751
COL5A1	32.18	5.09	6.97101
WFDC21P	4.04	0.55	6.95198
SNCAIP	1.76	0.27	6.9461
SMOC1	1.25	0.19	6.9359
ANKRD33B	1.96	0.31	6.93085
MLKL	26.3	4.27	6.92425
TMEM190	1.3	0.12	6.92168
CDR1	0.47	0.04	6.92168
ANXA10	0.41	0.04	6.92168
KPNA7	0.34	0.03	6.92168
SPAG6	0.21	0.02	6.92168
GRM2	0.22	0.03	6.92168
UNC13D	40.86	6.51	6.91567
FAM167A	3.25	0.51	6.91143
C11orf45	2.66	0.41	6.90987
TRPM6	0.45	0.07	6.90649
ITGA4	24.69	3.94	6.90423
GRAP	30.6	4.87	6.90162
TMEM132D	0.51	0.08	6.89125
HLA-G	16.35	2.59	6.89095
ZBTB32	2.97	0.46	6.88809
ALDH1A1	184.39	29.53	6.87719
CPNE7	3.49	0.54	6.86821
PRR5L	20	3.18	6.86597
IL9R	4.02	0.63	6.86019
GPR65	10.65	1.71	6.85898
TLE4	8.16	1.31	6.85828
NPM2	1.06	0.16	6.85044
VNN3	0.72	0.09	6.85044
SERPINB9P1	10.22	1.61	6.84548
ADCY7	44.93	7.31	6.84131
DMRTC1	0.4	0.03	6.82492
DMRTC1B	0.4	0.03	6.82492
L3MBTL4-AS1	2.33	0.36	6.82383
PPP1R16B	35.42	5.73	6.81757
LYPD5	2.6	0.41	6.81577
PROCR	25.36	4.07	6.81525
TNFRSF6B	23.37	3.73	6.81474
RASGRP2	17.84	2.84	6.8129
SOAT1	37.69	6.1	6.81231
COL23A1	1.19	0.18	6.80589
SERPINF2	7	1.05	6.79838
C9orf139	1.4	0.22	6.77437
TWIST2	4.04	0.61	6.77109
CADPS	0.61	0.09	6.77109
OAS1	77.09	12.47	6.76264
HSD3B7	39.84	6.48	6.75882
POM121L4P	0.11	0	6.75507
WNT7A	0.9	0.12	6.7546
PHYHIP	0.45	0.06	6.7546
DNAJB13	0.71	0.1	6.75328
MTHFD2	61.42	10.03	6.74378
FBLN2	28.02	4.57	6.73396
FHL2	30.16	4.89	6.73379
NAT8B	1.24	0.15	6.73369
TNFRSF9	6.36	1.04	6.73124
ORM1	13.27	2.11	6.72714
SPIB	8.49	1.44	6.72388
PPBP	2	0.3	6.71518
ITGB5	50.43	8.28	6.71421
SPOCK2	68.52	11.36	6.71197
2019-03-01	18.89	3.1	6.70299
TRG-AS1	5.67	0.92	6.70037
FLJ41200	1.42	0.22	6.69546
NFIL3	23.75	3.9	6.69191
CLCF1	5.77	0.97	6.68284
TMEM144	8.4	1.38	6.67545
SLC8A1	9.39	1.55	6.67343
DRP2	0.73	0.12	6.66455
KMO	6.12	1.01	6.66426
CCDC69	65.55	10.84	6.66008
LUM	802.49	132.84	6.65449
PSMB8-AS1	55.41	9.15	6.65132
MB21D1	10.25	1.68	6.65086
KIF19	1.3	0.21	6.64943
FGD2	42.97	7.12	6.648
VGLL1	1.04	0.14	6.64328
CLEC12A	16.39	2.61	6.64236
PPARG	26.56	4.37	6.63918
RNU1-13P	812.21	92.23	6.63376
ABCD2	0.92	0.15	6.63376
GGT5	38.87	6.41	6.63371
ZNF365	0.76	0.11	6.63365
CAMK1G	5.72	0.93	6.63331
ST8SIA4	15.72	2.38	6.63103
PFKFB4	19.01	3.16	6.62115
PDGFRL	2.94	0.47	6.61985
COCH	2.78	0.46	6.61803
HMHB1	1.1	0	6.6147
LOC101928226	1.02	0	6.6147
SCGB1C1	0.88	0	6.6147
TRERNA1	0.52	0	6.6147
DUPD1	0.44	0	6.6147
MS4A6E	0.44	0	6.6147
TEX29	0.38	0	6.6147
IGFL1	0.36	0	6.6147
REG1A	0.34	0	6.6147
MYL2	0.33	0	6.6147
LINC01146	0.32	0	6.6147
LOC102467224	0.3	0	6.6147
CELA1	0.27	0	6.6147
LOC102724784	0.26	0	6.6147
PRSS46	0.26	0	6.6147
SBK2	0.24	0	6.6147
REXO1L2P	0.23	0	6.6147
TP53TG3C	0.21	0	6.6147
HTR4	0.2	0	6.6147
NTS	0.2	0	6.6147
CALR3	0.19	0	6.6147
PGA5	0.17	0	6.6147
PLCE1-AS1	0.17	0	6.6147
CPB1	0.16	0	6.6147
COLEC10	0.14	0	6.6147
KRT23	0.14	0	6.6147
TDRD12	0.14	0	6.6147
LOC339807	0.13	0	6.6147
LRRIQ4	0.13	0	6.6147
TTC29	0.13	0	6.6147
SLC6A13	0.12	0	6.6147
FUT5	0.11	0	6.6147
CYP2G1P	0.09	0	6.6147
RGS7	0.09	0	6.6147
SLC22A13	0.09	0	6.6147
AIRN	0.08	0	6.6147
CDH20	0.08	0	6.6147
GJB4	0.08	0	6.6147
KLK2	0.08	0	6.6147
PAH	0.08	0	6.6147
C2orf78	0.07	0	6.6147
GOLGA6L2	0.07	0	6.6147
SLC13A5	0.07	0	6.6147
ZIC2	0.07	0	6.6147
PROX1-AS1	0.06	0	6.6147
SLC22A11	0.06	0	6.6147
VRTN	0.06	0	6.6147
SLITRK1	0.05	0	6.6147
VWA3B	0.05	0	6.6147
MROH2A	0.04	0	6.6147
VOPP1	155.08	25.65	6.60941
PTGIS	14.63	2.44	6.60239
TNFRSF11A	2.06	0.33	6.59195
LILRB5	37.62	6.17	6.59047
LOC101060091	3.41	0.48	6.59013
FAM216B	0.43	0.06	6.59013
DLX1	6.17	1.02	6.58959
CCR2	25.56	4.28	6.58597
LOXL1	18.47	3.08	6.58372
CNN2	135.41	22.65	6.58225
C1S	302.81	50.57	6.57284
LIPA	689.07	116.01	6.55067
PCBP3	1.88	0.29	6.53653
RGS14	25.3	4.25	6.53346
GATM	37.68	6.34	6.53227
GLA	113.68	19.12	6.53222
RCN3	28.67	4.81	6.53217
PLA2G5	4.9	0.81	6.52558
PCDHGA10	1.02	0.27	6.5251
RBM47	23.42	4.04	6.50808
MDFI	15.91	2.68	6.50053
LCN8	0.67	0.07	6.49092
RNF126P1	0.43	0.04	6.49092
LOC100507250	0.31	0.03	6.49092
MGAM2	0.06	0.01	6.49092
TENM2	0.05	0.01	6.49092
CFD	292.35	49.47	6.48899
SLC39A11	27.63	4.68	6.4841
SNORA43	193.88	0	6.48369
KLHDC8B	76.64	13.01	6.47818
PDE2A	5.56	0.93	6.47776
EPHB6	4.43	0.68	6.47459
DGKA	37.89	6.55	6.4718
GPR160	10.79	1.82	6.46697
LOC100996455	0.82	0.12	6.46392
LOC541472	0.65	0.08	6.45392
DIO1	0.51	0.06	6.45392
KCNN1	0.31	0.04	6.45392
CLDN10	1.59	0.24	6.45016
C1R	236.28	40.38	6.44451
SPINT2	118.61	20.29	6.44283
CBLC	0.77	0.11	6.43198
IGFLR1	44.23	7.55	6.41142
ASGR2	3.67	0.54	6.41021
SYNGR3	2.77	0.46	6.39572
PLEK2	4.25	0.71	6.355
CARD16	85.36	14.91	6.34348
ERMN	1.06	0.17	6.34185
PLCXD2	1.41	0.22	6.32419
HCG27	1.55	0.25	6.31729
CIITA	46.38	8.12	6.31582
EMP1	90.53	15.79	6.31411
PIK3IP1	135.23	23.65	6.29535
SLC25A19	41.6	7.3	6.29444
BST2	328.95	57.35	6.29334
VSIG4	141.37	24.37	6.2924
SMPD3	8.33	1.45	6.29219
CCDC74A	3.15	0.55	6.28918
PYGL	48.2	8.43	6.28806
IGF1	11.25	1.61	6.28619
E2F2	3.18	0.55	6.28562
IKZF3	18.88	3.29	6.28345
SAMHD1	119.86	21.05	6.27717
CLEC4G	1.12	0.17	6.26119
ARRDC5	0.88	0.13	6.26119
CCDC151	0.76	0.1	6.26119
CACNA1I	0.3	0.05	6.25629
ATP1A3	1.34	0.23	6.25487
PARP12	37.45	6.62	6.25353
NLRC5	40.74	7.2	6.24368
MTFR2	4.05	0.59	6.24163
FAM223A	0.63	0.05	6.23497
FAM223B	0.63	0.05	6.23497
ZMYND15	10.54	1.84	6.23322
ABAT	8.46	1.49	6.22974
CFAP57	0.25	0.04	6.22896
HCG26	6.44	1.1	6.22624
CD209	22.81	4.03	6.22029
RASAL1	1.35	0.23	6.21747
DTHD1	2.34	0.4	6.21429
C1orf228	2.28	0.38	6.21427
TNFAIP2	136.85	24.3	6.21178
PCDH10	0.37	0.06	6.20698
CCDC88C	13.08	2.33	6.18759
RALY-AS1	3.75	0.73	6.18095
LY75	11.48	2.05	6.17922
AKR1A1	259.78	46.3	6.17523
KIR2DS4	0.51	0.07	6.17415
CKM	0.49	0.06	6.17415
GCKR	0.36	0.05	6.17415
UNQ6494	0.36	0.05	6.17415
RTN1	8.89	1.58	6.16646
PTK2B	53.59	9.01	6.15707
NCAM1	2.11	0.37	6.15706
TMEM132A	12.68	2.26	6.15689
DHRS2	0.49	0.06	6.15258
GK	20.53	3.64	6.14843
ACOT11	3.66	0.63	6.14826
C3orf36	1.02	0.16	6.14603
GALNT9	0.69	0.15	6.14603
FAM72B	2.49	0.43	6.14144
ARHGAP22	10.7	2.15	6.13777
ALOX15P1	0.95	0.1	6.1377
ULBP2	1.36	0.22	6.12629
TSPAN2	3.02	0.53	6.11615
LOC388242	0.97	0.15	6.11594
LOC613038	0.97	0.15	6.11594
TMEM147	122.79	21.69	6.10841
LRRC34	0.75	0.11	6.09672
TSKS	0.76	0.12	6.09672
SFN	14.87	2.66	6.08841
SH3BGRL3	635.76	114.71	6.08714
CLDN1	6.7	1.2	6.08346
TRIM69	3.54	0.71	6.07957
ITGBL1	17.88	2.5	6.06942
TMEM51	53.62	9.8	6.06111
LINC01050	0.79	0.08	6.06017
LOC440461	0.31	0.03	6.06017
KIAA1257	0.29	0.03	6.06017
METTL7B	5.49	0.97	6.04849
WFDC2	156.25	28.06	6.04804
CXCR2	3.43	0.61	6.04745
LOC101929331	14.08	2.46	6.04465
RSPO3	1.57	0.28	6.03595
JAKMIP2	0.94	0.17	6.03073
C8orf44-SGK3	1.44	0.26	6.02759
NLRC4	8.41	1.52	6.02252
SHB	3.57	0.65	6.02251
PRRG3	0.87	0.13	6.02181
HEATR9	0.54	0.08	6.02181
KCNF1	0.46	0.07	6.02181
GALNTL6	0.36	0.05	6.02181
MUC12	0.06	0.01	6.02181
TNFSF13	138.2	24.22	6.01992
TLR5	9.85	1.8	6.00762
TMSB10	7797.25	1411.28	5.99623
HIST1H2BD	10.55	1.25	5.9949
CCL11	9.08	1.62	5.99156
SYNGR2	301.16	55.33	5.98979
EMBP1	0.82	0.14	5.98207
JCHAIN	1747.24	321.73	5.97375
IFITM2	412.62	75.56	5.97144
UBXN10	1.89	0.34	5.96967
GOLGA8EP	0.17	0.02	5.96824
SLC16A6	4.2	0.77	5.96641
HSH2D	23.02	4.19	5.96189
ZNF385D	1.38	0.23	5.95665
ARNTL2	3.28	0.61	5.9548
PARP8	10.9	2.02	5.95342
TGM2	309.54	58.12	5.94981
ACKR3	8.52	1.56	5.93841
TOX2	16.7	3.06	5.93603
RAP1GAP2	4.09	0.76	5.93378
CHST7	6.22	1.14	5.93155
HLA-C	3946.36	732.35	5.93081
RASGRP3	14.29	2.66	5.93062
CYP4F12	1.83	0.31	5.93048
ALDH2	200.76	37.35	5.92941
DSE	23.21	4.32	5.92193
LINC01137	4.48	0.81	5.91948
ADA	23.47	4.35	5.90978
APOL3	84.37	15.66	5.9079
ARHGAP4	72.35	13.51	5.90395
PCOLCE	103.41	19.26	5.90345
SCN5A	0.23	0.04	5.90206
TACSTD2	30.02	5.59	5.89931
C10orf10	80.96	15.1	5.89826
SMPDL3B	8.77	1.58	5.89531
LINC01353	1.33	0.18	5.89438
RFX8	0.45	0.06	5.89438
KLHDC8A	0.27	0.04	5.89438
CDC25A	1.7	0.31	5.89162
ETS1	92.05	17.3	5.88631
LOC728392	12.01	2.22	5.88524
MILR1	19.29	3.5	5.88261
CDH3	8.11	1.52	5.86623
RBAK-RBAKDN	0.27	0	5.86608
KLHL4	1.09	0.1	5.86314
LINGO3	2.3	0.42	5.85981
NEIL3	2.7	0.49	5.85816
P2RX1	5.9	1.1	5.85574
ZNF214	0.98	0.17	5.83815
MEI1	7.91	1.49	5.83219
STAR	1.64	0.3	5.82726
FMO1	15.49	2.9	5.8197
EPB41L4A-AS2	0.77	0.12	5.81879
LOC101927811	1.4	0.21	5.81465
RSPH1	0.83	0.11	5.81465
BARX2	0.59	0.09	5.81465
IGLON5	0.32	0.05	5.81465
CATSPERG	0.26	0.04	5.81465
ACTA2	122.58	21.09	5.81067
RCAN2	5.73	1.07	5.80737
TGFB1	124.32	23.59	5.80639
ZNF215	1.34	0.25	5.80301
KCNE3	26.82	5.09	5.79852
SCPEP1	299.47	56.88	5.7969
MLLT3	3.54	0.67	5.79212
FAM107B	57.15	10.84	5.7886
NFATC1	18.64	3.09	5.78635
GRAP2	11.36	2.15	5.78461
ADAP1	12.84	2.48	5.77823
ACTN1	87.3	16.67	5.77683
TDRD9	2.63	0.5	5.7685
KRT19	96.94	18.47	5.76632
NTRK1	1.39	0.25	5.76568
ARHGEF3	24.5	4.7	5.74287
KCNA5	0.52	0.09	5.73692
LIME1	57.13	10.45	5.72692
MRVI1	3.61	0.7	5.72281
GABRR2	1.05	0.19	5.71965
C10orf105	1.01	0.19	5.71834
SMIM6	2.61	0.45	5.71507
RHOF	20.59	3.96	5.71386
FAM105A	10.17	1.96	5.71373
GPR55	1.33	0.25	5.71173
FOXS1	2.99	0.55	5.70806
FAM49A	15.02	2.9	5.7059
STAT1	413.34	77.95	5.70229
BTG2	114.18	22.07	5.70094
HLA-H	135.18	26.07	5.70047
CMPK2	8.82	1.65	5.69438
SRPX2	13.06	2.51	5.69249
KLRG1	8.23	1.57	5.69238
FAM231D	3.3	0.62	5.69195
UNC93B1	87.11	16.86	5.68755
PINLYP	10.8	1.98	5.68654
CCND2	17.22	3.34	5.68215
FCRL5	11.46	2.22	5.68203
IFT74-AS1	0.78	0	5.67892
LINC01412	0.76	0	5.67892
HIST1H2BH	0.75	0	5.67892
LOC102724601	0.68	0	5.67892
LOC100422556	0.67	0	5.67892
LGALS7B	0.59	0	5.67892
LOC100505984	0.56	0	5.67892
LOC101928161	0.51	0	5.67892
LINC00844	0.37	0	5.67892
C3orf84	0.34	0	5.67892
C9orf24	0.33	0	5.67892
CGA	0.31	0	5.67892
LOC101927650	0.31	0	5.67892
FANCD2OS	0.26	0	5.67892
GP9	0.25	0	5.67892
OR5B21	0.23	0	5.67892
AQP7	0.16	0	5.67892
LOC388282	0.16	0	5.67892
LINC00593	0.15	0	5.67892
ABHD12B	0.13	0	5.67892
ERICH5	0.13	0	5.67892
KIR2DL1	0.12	0	5.67892
SEMG1	0.12	0	5.67892
FAM71D	0.11	0	5.67892
LOC389332	0.11	0	5.67892
YBX3P1	0.11	0	5.67892
YWHAEP1	0.11	0	5.67892
C12orf74	0.1	0	5.67892
CCIN	0.1	0	5.67892
CPLX4	0.1	0	5.67892
FAM83F	0.09	0	5.67892
GBA3	0.09	0	5.67892
IVL	0.09	0	5.67892
KNG1	0.09	0	5.67892
MSX2P1	0.09	0	5.67892
ASCL4	0.08	0	5.67892
CCDC83	0.08	0	5.67892
DDX4	0.08	0	5.67892
MAFA	0.08	0	5.67892
SLC5A11	0.08	0	5.67892
SLC7A3	0.08	0	5.67892
KCTD8	0.07	0	5.67892
PCK1	0.07	0	5.67892
DLGAP1-AS5	0.06	0	5.67892
DRC7	0.06	0	5.67892
FGF23	0.06	0	5.67892
SNTG1	0.06	0	5.67892
SOX21-AS1	0.06	0	5.67892
WNT16	0.06	0	5.67892
MYHAS	0.05	0	5.67892
DPP10	0.04	0	5.67892
FRMPD2	0.04	0	5.67892
MAGEC1	0.04	0	5.67892
SPATA31E1	0.04	0	5.67892
ADGB	0.03	0	5.67892
CFAP74	0.03	0	5.67892
LOC101928266	0.03	0	5.67892
[truncated: 18,590 more rows]
[truncated: 3 more columns]
